# Supplementary material
Source: HighWire-hosted journal article supplement (https://oem.bmj.com/content/80/8/469)
Supplement: inline-supplementary-material-1 [file inline-supplementary-material-1.pdf]

| Database | Population AND                                                                                                                                                                                                                                                                                                                                                                                                                                                                                                                                                                                                                                                                                                                                                                                                                                                                                                                                                                                                                                        | Intervention AND                                                                                                                                                                                                                                                                                                                                                                                                                        | Study Design/Control AND                                                                                                                                                                                                                                                                                                                                                                                                                                                                                                                                                                                                                                                                                                                                                                                                                                        | Outcomes                                                                                                                                                                                                                                                                                                                                                                                                                                                                                                                                                                                                                                                                                                                                                                                                                                                                                                                                                                                                                                                                                                                                                                       |
|----------|-------------------------------------------------------------------------------------------------------------------------------------------------------------------------------------------------------------------------------------------------------------------------------------------------------------------------------------------------------------------------------------------------------------------------------------------------------------------------------------------------------------------------------------------------------------------------------------------------------------------------------------------------------------------------------------------------------------------------------------------------------------------------------------------------------------------------------------------------------------------------------------------------------------------------------------------------------------------------------------------------------------------------------------------------------|-----------------------------------------------------------------------------------------------------------------------------------------------------------------------------------------------------------------------------------------------------------------------------------------------------------------------------------------------------------------------------------------------------------------------------------------|-----------------------------------------------------------------------------------------------------------------------------------------------------------------------------------------------------------------------------------------------------------------------------------------------------------------------------------------------------------------------------------------------------------------------------------------------------------------------------------------------------------------------------------------------------------------------------------------------------------------------------------------------------------------------------------------------------------------------------------------------------------------------------------------------------------------------------------------------------------------|--------------------------------------------------------------------------------------------------------------------------------------------------------------------------------------------------------------------------------------------------------------------------------------------------------------------------------------------------------------------------------------------------------------------------------------------------------------------------------------------------------------------------------------------------------------------------------------------------------------------------------------------------------------------------------------------------------------------------------------------------------------------------------------------------------------------------------------------------------------------------------------------------------------------------------------------------------------------------------------------------------------------------------------------------------------------------------------------------------------------------------------------------------------------------------|
| PubMed   | ("Occupational Groups"[Mesh]<br>OR "Occupational Health"[Mesh]<br>OR "enterprise*" [tiab] OR<br>"business*" [tiab] OR<br>"employed" [tiab] OR<br>"employee*" [tiab] OR<br>"employer*" [tiab] OR<br>"employment*" [tiab] OR<br>"informal sector*" [tiab] OR<br>"informal work*" [tiab] OR<br>"laborer*" [tiab] OR<br>"labourer*" [tiab] OR<br>"occupation*" [tiab] OR<br>"personnel*" [tiab] OR<br>"professional" [tiab] OR<br>"professionals" [tiab] OR<br>"staff" [tiab] OR<br>"staffing*" [tiab] OR<br>"vocation" [tiab] OR<br>"vocations" [tiab] OR<br>"worker*" [tiab] OR<br>"workforce" [tiab] OR<br>"workplace*" [tiab] OR<br>"work place*" [tiab] OR<br>"worksite*" [tiab]<br><br>OR<br><br>"ambulance*" [tiab] OR<br>"paramedic*" [tiab] OR<br>"disaster responder*" [tiab] OR<br>"doctor*" [tiab] OR<br>"emergency service*" [tiab] OR<br>"emergency responder*" [tiab]<br>OR<br>"emergency medical" [tiab] OR<br>"firefighter*" [tiab] OR<br>"fire fighter*" [tiab] OR<br>"first responder*" [tiab] OR<br>"general practitioner*" [tiab] OR | (screen* [tiab] OR<br>monitoring [tiab] OR<br>check [tiab] OR<br>check-up [tiab] OR<br>surveillance [tiab] OR<br>detection [tiab])<br><br>AND<br><br>("employee*" [tiab] OR<br>"laborer*" [tiab] OR<br>"labourer*" [tiab] OR<br>"personnel*" [tiab] OR<br>"professionals" [tiab]<br>OR<br>"staff" [tiab] OR<br>"worker*" [tiab] OR<br>"workforce" [tiab] OR<br>"workplace*" [tiab] OR<br>"work place*" [tiab] OR<br>"worksite*" [tiab]) | "Randomized Controlled Trial" [Publication Type] OR<br>"Randomized Controlled Trials as Topic" [Mesh] OR<br>"Non-Randomized Controlled Trials as Topic" [Mesh]<br>OR<br>"Random Allocation" [Mesh] OR<br>"RCT" [tiab] OR<br>"randomized controlled trial" [tiab] OR<br>"randomised controlled trial" [tiab] OR<br>"non-randomized controlled trial" [tiab] OR<br>"non-randomised controlled trial" [tiab] OR<br>"non randomized controlled trial" [tiab] OR<br>"non randomised controlled trial" [tiab] OR<br>"random allocation" [tiab] OR<br>"random assignment" [tiab] OR<br>"randomized" [tiab] OR<br>"randomised" [tiab] OR<br>"quasi-experiment*" [tiab] OR<br>"quasi experiment*" [tiab] OR<br>"control group" [tiab] OR<br>"comparison group" [tiab] OR<br>"wait-list control" [tiab] OR<br>"wait list control" [tiab] OR<br>"control condition" [tiab] | "Mental Disorders" [Mesh] OR<br>"Mental Health" [Mesh] OR<br>"Psychology, Industrial" [Mesh] OR<br>"Stress, Psychological" [Mesh] OR<br>"adjustment" [tiab] OR<br>"affective disorder*" [tiab] OR<br>"anxiet*" [tiab] OR<br>"bipolar*" [tiab] OR<br>"burn out*" [tiab] OR<br>"burnout*" [tiab] OR<br>"CMD" [tiab] OR<br>"depressi*" [tiab] OR<br>"eating disorder*" [tiab] OR<br>"mental disorder*" [tiab] OR<br>"mental health*" [tiab] OR<br>"mental illness*" [tiab] OR<br>"mood disorder*" [tiab] OR<br>"obsessive compulsive disorder*" [tiab] OR<br>"ocd" [tiab] OR<br>"panic disorder*" [tiab] OR<br>"phobi*" [tiab] OR<br>"post traumatic*" [tiab] OR<br>"psychiatric diagnos*" [tiab] OR<br>"psychiatric disease*" [tiab] OR<br>"psychiatric disorder*" [tiab] OR<br>"psychiatric illness*" [tiab] OR<br>"psychological disorder*" [tiab] OR<br>"psychos*" [tiab] OR<br>"psychotic*" [tiab] OR<br>"psychological distress*" [tiab] OR<br>"ptsd" [tiab] OR<br>"ptss" [tiab] OR<br>"somatoform disorder*" [tiab] OR<br>"schizophren*" [tiab] OR<br>"stress*" [tiab]<br><br>OR<br><br>"User satisfaction" [tiab] OR<br>"acceptability" [tiab] OR<br>"feasibility" [tiab] |

|                                                                                                                                                                                                                                                                                                                                                                                                                                                                                                                                                                                                                                                                                           |  |  |  |                                                                                                                                                                                                                                                                                                                                                                                                                                                                                                                                                                                                                                                                                                                                                                                                                                                                                                                                                                                                                                                                                                                                                                                                                                              |
|-------------------------------------------------------------------------------------------------------------------------------------------------------------------------------------------------------------------------------------------------------------------------------------------------------------------------------------------------------------------------------------------------------------------------------------------------------------------------------------------------------------------------------------------------------------------------------------------------------------------------------------------------------------------------------------------|--|--|--|----------------------------------------------------------------------------------------------------------------------------------------------------------------------------------------------------------------------------------------------------------------------------------------------------------------------------------------------------------------------------------------------------------------------------------------------------------------------------------------------------------------------------------------------------------------------------------------------------------------------------------------------------------------------------------------------------------------------------------------------------------------------------------------------------------------------------------------------------------------------------------------------------------------------------------------------------------------------------------------------------------------------------------------------------------------------------------------------------------------------------------------------------------------------------------------------------------------------------------------------|
| <p>"health care provider*"[tiab] OR<br/> "healthcare provider*"[tiab] OR<br/> "humanitarian aid*"[tiab] OR<br/> "humanitarian relie*"[tiab] OR<br/> "humanitarian service*"[tiab] OR<br/> "humanitarian worker*"[tiab] OR<br/> "medical resident*"[tiab] OR<br/> "medic"[tiab] OR<br/> "medics"[tiab] OR<br/> "nurse*"[tiab] OR<br/> "nursing"[tiab] OR<br/> "paramedic*"[tiab] OR<br/> "police*"[tiab] OR<br/> "police m*"[tiab] OR<br/> "police wom*"[tiab] OR<br/> "police officer*"[tiab] OR<br/> "firem*"[tiab] OR<br/> "fire m*"[tiab] OR<br/> "fire wom*"[tiab] OR<br/> "physician*"[tiab] OR<br/> "relief work*"[tiab] OR<br/> "rescuer*"[tiab] OR<br/> "rescue work*"[tiab])</p> |  |  |  | <p>OR<br/> "Absenteeism"[Mesh] OR<br/> "Employment"[Mesh] OR<br/> "Job Satisfaction"[MeSH] OR<br/> "Sick Leave"[Mesh] OR<br/> "Retirement"[Mesh] OR<br/> "Work Capacity Evaluation"[Mesh] OR<br/> "absenteeism*"[tiab] OR<br/> "back to work"[tiab] OR<br/> "early retir*"[tiab] OR<br/> "effectiveness"[tiab] OR<br/> "employabil*"[tiab] OR<br/> "employment status*"[tiab] OR<br/> "job length*"[tiab] OR<br/> "job retenti*"[tiab] OR<br/> "job satisf*"[tiab] OR<br/> "work satisf*"[tiab] OR<br/> "medical certificate*"[tiab] OR<br/> "presenteeism*"[tiab] OR<br/> "productivit*"[tiab] OR<br/> "prolonged work*"[tiab] OR<br/> "prolonging work*"[tiab] OR<br/> "resignati*"[tiab] OR<br/> "return to work"[tiab] OR<br/> "sick leav*"[tiab] OR<br/> "sickness absen*"[tiab] OR<br/> "sickness presen*"[tiab] OR<br/> "sick listing*"[tiab] OR<br/> "sustainable work*"[tiab] OR<br/> "sustained work*"[tiab] OR<br/> "unemploy*"[tiab] OR<br/> "work absence*"[tiab] OR<br/> "work abilit*"[tiab] OR<br/> "work capacit*"[tiab] OR<br/> "work disabilit*"[tiab] OR<br/> "work engag*"[tiab] OR<br/> "work function*"[tiab] OR<br/> "work participati*"[tiab] OR<br/> "work performan*"[tiab] OR<br/> "work retention"[tiab] OR</p> |
|-------------------------------------------------------------------------------------------------------------------------------------------------------------------------------------------------------------------------------------------------------------------------------------------------------------------------------------------------------------------------------------------------------------------------------------------------------------------------------------------------------------------------------------------------------------------------------------------------------------------------------------------------------------------------------------------|--|--|--|----------------------------------------------------------------------------------------------------------------------------------------------------------------------------------------------------------------------------------------------------------------------------------------------------------------------------------------------------------------------------------------------------------------------------------------------------------------------------------------------------------------------------------------------------------------------------------------------------------------------------------------------------------------------------------------------------------------------------------------------------------------------------------------------------------------------------------------------------------------------------------------------------------------------------------------------------------------------------------------------------------------------------------------------------------------------------------------------------------------------------------------------------------------------------------------------------------------------------------------------|

|  |  |  |  |                                                                                                                                                                                                                                                                                                                                                                                                                                                                                                                                                                                                                                                                                                                                                                                                                                                                                                                                                                                                         |
|--|--|--|--|---------------------------------------------------------------------------------------------------------------------------------------------------------------------------------------------------------------------------------------------------------------------------------------------------------------------------------------------------------------------------------------------------------------------------------------------------------------------------------------------------------------------------------------------------------------------------------------------------------------------------------------------------------------------------------------------------------------------------------------------------------------------------------------------------------------------------------------------------------------------------------------------------------------------------------------------------------------------------------------------------------|
|  |  |  |  | <p>"turnover*"[tiab] OR<br/>"turn over*"[tiab]</p> <p>OR</p> <p>"drop out*"[tiab] OR<br/>"dropout*"[tiab]</p> <p>OR</p> <p>"Optimism"[Mesh] OR<br/>"Personal Satisfaction"[Mesh] OR<br/>"Self Concept"[Mesh:NoExp] OR<br/>"Self Efficacy"[Mesh] OR<br/>"Self-Control"[Mesh] OR<br/>"life engag*"[tiab] OR<br/>"life satisf*"[tiab] OR<br/>"meaning of life"[tiab] OR<br/>"purpose in life"[tiab] OR<br/>"positive affect*"[tiab] OR<br/>"positive emotion*"[tiab] OR<br/>"resilien*"[tiab] OR<br/>"self concept*"[tiab] OR<br/>"self control*"[tiab] OR<br/>"self efficac*"[tiab] OR<br/>"self esteem*"[tiab] OR<br/>"swb"[tiab] OR<br/>"well being*"[tiab] OR<br/>"wellbeing*"[tiab]</p> <p>OR</p> <p>"Quality of Life"[Mesh] OR<br/>"Quality-Adjusted Life Years"[Mesh] OR<br/>"disability adjusted life"[tiab] OR<br/>"qaly"[tiab] OR<br/>"daly"[tiab] OR<br/>"functioning"[tiab] OR<br/>"functional abilit*"[tiab] OR<br/>"functionalit*" OR<br/>"hrqol*"[tiab] OR<br/>"life activit*"[tiab] OR</p> |
|--|--|--|--|---------------------------------------------------------------------------------------------------------------------------------------------------------------------------------------------------------------------------------------------------------------------------------------------------------------------------------------------------------------------------------------------------------------------------------------------------------------------------------------------------------------------------------------------------------------------------------------------------------------------------------------------------------------------------------------------------------------------------------------------------------------------------------------------------------------------------------------------------------------------------------------------------------------------------------------------------------------------------------------------------------|

|                         |                                                                                                                                                                                                                                                                                                                                                                                                                                                                                                                                        |                                                                                                                                                                                                                                                                                                                                                                                                                     |                                                                                                                                                                                                                                                                                                                                                                                                                                                                                                                                                                                                                                                                                                                                               |                                                                                                                                                                                                                                                                                                                                                                                                                                                                                                                                                                                                                                        |
|-------------------------|----------------------------------------------------------------------------------------------------------------------------------------------------------------------------------------------------------------------------------------------------------------------------------------------------------------------------------------------------------------------------------------------------------------------------------------------------------------------------------------------------------------------------------------|---------------------------------------------------------------------------------------------------------------------------------------------------------------------------------------------------------------------------------------------------------------------------------------------------------------------------------------------------------------------------------------------------------------------|-----------------------------------------------------------------------------------------------------------------------------------------------------------------------------------------------------------------------------------------------------------------------------------------------------------------------------------------------------------------------------------------------------------------------------------------------------------------------------------------------------------------------------------------------------------------------------------------------------------------------------------------------------------------------------------------------------------------------------------------------|----------------------------------------------------------------------------------------------------------------------------------------------------------------------------------------------------------------------------------------------------------------------------------------------------------------------------------------------------------------------------------------------------------------------------------------------------------------------------------------------------------------------------------------------------------------------------------------------------------------------------------------|
|                         |                                                                                                                                                                                                                                                                                                                                                                                                                                                                                                                                        |                                                                                                                                                                                                                                                                                                                                                                                                                     |                                                                                                                                                                                                                                                                                                                                                                                                                                                                                                                                                                                                                                                                                                                                               | <p>"life participati*"[tiab] OR<br/> "life stress*"[tiab] OR<br/> "qol"[tiab] OR<br/> "qoli"[tiab] OR<br/> "quality of life*"[tiab] OR<br/> "self car*"[tiab] OR<br/> "selfcar*"[tiab] OR<br/> "sickness impact profile*" [tiab] OR<br/> "social function*"[tiab] OR<br/> "social participati*"[tiab]</p> <p>OR</p> <p>"Help-Seeking Behavior"[Mesh] OR<br/> "helpseek*"[tiab] OR<br/> "help seek*"[tiab] OR<br/> "help-seek*"[tiab] OR<br/> "seek help"[tiab] OR<br/> "seeking help"[tiab] OR<br/> "seek treatment"[tiab] OR<br/> "seeking treatment"[tiab] OR<br/> "treatment seeking"[tiab] OR<br/> "help seeking behav*"[tiab]</p> |
| <b>PsychINFO (Ovid)</b> | <p>"Occupational Groups".MH. OR<br/> "Occupational Health".MH. OR<br/> "Personnel".sh. OR<br/> "enterprise*".ti,ab. OR<br/> "business*".ti,ab. OR<br/> "employed".ti,ab. OR<br/> "employee*".ti,ab. OR<br/> "employer*".ti,ab. OR<br/> "employment*".ti,ab. OR<br/> "informal sector*".ti,ab. OR<br/> "informal work*".ti,ab. OR<br/> "laborer*".ti,ab. OR<br/> "labourer*".ti,ab. OR<br/> "occupation*".ti,ab. OR<br/> "personnel*".ti,ab. OR<br/> "professional".ti,ab. OR<br/> "professionals".ti,ab. OR<br/> "staff".ti,ab. OR</p> | <p>(screen*.ti,ab. OR<br/> monitoring.ti,ab. OR<br/> check.ti,ab. OR<br/> check-up.ti,ab. OR<br/> surveillance.ti,ab. OR<br/> detection.ti,ab.)</p> <p>AND</p> <p>("employee*".ti,ab. OR<br/> "laborer*".ti,ab. OR<br/> "labourer*".ti,ab. OR<br/> "personnel*".ti,ab. OR<br/> "professionals".ti,ab.<br/> OR "staff".ti,ab. OR<br/> "worker*".ti,ab. OR<br/> "workforce".ti,ab. OR<br/> "workplace*".ti,ab. OR</p> | <p>"Randomized Controlled Trial".pt. OR<br/> "Randomized Controlled Trials as Topic".mh. OR<br/> "Non-Randomized Controlled Trials as Topic".mh. OR<br/> "Random Allocation".mh. OR<br/> "RCT".ti,ab. OR<br/> "randomized controlled trial".ti,ab. OR<br/> "randomised controlled trial".ti,ab. OR<br/> "non-randomized controlled trial".ti,ab. OR<br/> "non-randomised controlled trial".ti,ab. OR<br/> "non randomized controlled trial".ti,ab. OR<br/> "non randomised controlled trial".ti,ab. OR<br/> "random allocation".ti,ab. OR<br/> "random assignment".ti,ab. OR<br/> "randomized".ti,ab. OR<br/> "randomised".ti,ab. OR<br/> "quasi-experiment*".ti,ab. OR<br/> "quasi experiment*".ti,ab. OR<br/> "control group".ti,ab. OR</p> | <p>"Mental Disorders".mh. OR<br/> "Mental Health".mh. OR<br/> "Psychology, Industrial".mh. OR<br/> "Stress, Psychological".mh. OR<br/> "Psychological Stress".sh. OR<br/> "adjustment".ti,ab. OR<br/> "affective disorder*".ti,ab. OR<br/> "anxiet*".ti,ab. OR<br/> "bipolar*".ti,ab. OR<br/> "burn out*".ti,ab. OR<br/> "burnout*".ti,ab. OR<br/> "CMD" .ti,ab. OR<br/> "depressi*".ti,ab. OR<br/> "eating disorder*".ti,ab. OR<br/> "mental disorder*".ti,ab. OR<br/> "mental health*".ti,ab. OR<br/> "mental illness*".ti,ab. OR<br/> "mood disorder*".ti,ab. OR</p>                                                                |

|                                                                                                                                                                                                                                                                                                                                                                                                                                                                                                                                                                                                                                                                                                                                                                                                                                                                                                                                                                                                                                                                                                                                                                                                                     |                                                         |                                                                                                                                           |                                                                                                                                                                                                                                                                                                                                                                                                                                                                                                                                                                                                                                                                                                                                                                                                                                                                                                                                                                                                                                                                                                                                                                                                            |
|---------------------------------------------------------------------------------------------------------------------------------------------------------------------------------------------------------------------------------------------------------------------------------------------------------------------------------------------------------------------------------------------------------------------------------------------------------------------------------------------------------------------------------------------------------------------------------------------------------------------------------------------------------------------------------------------------------------------------------------------------------------------------------------------------------------------------------------------------------------------------------------------------------------------------------------------------------------------------------------------------------------------------------------------------------------------------------------------------------------------------------------------------------------------------------------------------------------------|---------------------------------------------------------|-------------------------------------------------------------------------------------------------------------------------------------------|------------------------------------------------------------------------------------------------------------------------------------------------------------------------------------------------------------------------------------------------------------------------------------------------------------------------------------------------------------------------------------------------------------------------------------------------------------------------------------------------------------------------------------------------------------------------------------------------------------------------------------------------------------------------------------------------------------------------------------------------------------------------------------------------------------------------------------------------------------------------------------------------------------------------------------------------------------------------------------------------------------------------------------------------------------------------------------------------------------------------------------------------------------------------------------------------------------|
| <p>"staffing*".ti,ab. OR<br/> "vocation".ti,ab. OR<br/> "vocations".ti,ab. OR<br/> "worker*".ti,ab. OR<br/> "workforce".ti,ab. OR<br/> "workplace*".ti,ab. OR<br/> "work place*".ti,ab. OR<br/> "worksite*".ti,ab.</p> <p>OR</p> <p>"ambulance*".ti,ab. OR<br/> "paramedic*".ti,ab. OR<br/> "disaster responder*".ti,ab. OR<br/> "doctor*".ti,ab. OR<br/> "emergency service*".ti,ab. OR<br/> "emergency responder*".ti,ab.</p> <p>OR</p> <p>"emergency medical".ti,ab. OR<br/> "firefighter*".ti,ab. OR<br/> "fire fighter*".ti,ab. OR<br/> "first responder*".ti,ab. OR<br/> "general practitioner*".ti,ab. OR<br/> "health care provider*".ti,ab. OR<br/> "healthcare provider*".ti,ab. OR<br/> "humanitarian aid*".ti,ab. OR<br/> "humanitarian relie*".ti,ab. OR<br/> "humanitarian service*".ti,ab. OR<br/> "humanitarian worker*".ti,ab. OR<br/> "medical resident*".ti,ab. OR<br/> "medic".ti,ab. OR<br/> "medics".ti,ab. OR<br/> "nurse*".ti,ab. OR<br/> "nursing".ti,ab. OR<br/> "paramedic*".ti,ab. OR<br/> "police*".ti,ab. OR<br/> "police m*".ti,ab. OR<br/> "police wom*".ti,ab. OR<br/> "police officer*".ti,ab. OR<br/> "firem*".ti,ab. OR<br/> "fire m*".ti,ab. OR<br/> "fire wom*".ti,ab. OR</p> | <p>"work place*".ti,ab. OR<br/> "worksite*".ti,ab.)</p> | <p>"comparison group".ti,ab. OR<br/> "wait-list control".ti,ab. OR<br/> "wait list control".ti,ab. OR<br/> "control condition".ti,ab.</p> | <p>"obsessive compulsive disorder*".ti,ab. OR<br/> "ocd".ti,ab. OR<br/> "panic disorder*".ti,ab. OR<br/> "phobi*".ti,ab. OR<br/> "post traumatic*".ti,ab. OR<br/> "psychiatric diagnos*".ti,ab. OR<br/> "psychiatric disease*".ti,ab. OR<br/> "psychiatric disorder*".ti,ab. OR<br/> "psychiatric illness*".ti,ab. OR<br/> "psychological disorder*".ti,ab. OR<br/> "psychos*".ti,ab. OR<br/> "psychotic*".ti,ab. OR<br/> "psychological distress*".ti,ab. OR<br/> "ptsd".ti,ab. OR<br/> "ptss".ti,ab. OR<br/> "somatiform disorder*".ti,ab. OR<br/> "schizophren*".ti,ab. OR<br/> "stress*".ti,ab.</p> <p>OR</p> <p>"User satisfaction".ti,ab. OR<br/> "acceptability".ti,ab. OR<br/> "feasibility".ti,ab.</p> <p>OR</p> <p>"Absenteeism".mh. OR<br/> "Employment".mh. OR<br/> "Employee Efficiency".sh. OR<br/> "Employee Absenteeism".sh. OR<br/> "Job Satisfaction".mh. OR<br/> "Sick Leave".mh. OR<br/> "Employee Leave Benefit".mh. OR<br/> "Retirement".mh. OR<br/> "Work Capacity Evaluation".mh. OR<br/> "absenteeism*".ti,ab. OR<br/> "back to work".ti,ab. OR<br/> "early retir*".ti,ab. OR<br/> "effectiveness".ti,ab. OR<br/> "employabil*".ti,ab. OR<br/> "employment status*".ti,ab. OR</p> |
|---------------------------------------------------------------------------------------------------------------------------------------------------------------------------------------------------------------------------------------------------------------------------------------------------------------------------------------------------------------------------------------------------------------------------------------------------------------------------------------------------------------------------------------------------------------------------------------------------------------------------------------------------------------------------------------------------------------------------------------------------------------------------------------------------------------------------------------------------------------------------------------------------------------------------------------------------------------------------------------------------------------------------------------------------------------------------------------------------------------------------------------------------------------------------------------------------------------------|---------------------------------------------------------|-------------------------------------------------------------------------------------------------------------------------------------------|------------------------------------------------------------------------------------------------------------------------------------------------------------------------------------------------------------------------------------------------------------------------------------------------------------------------------------------------------------------------------------------------------------------------------------------------------------------------------------------------------------------------------------------------------------------------------------------------------------------------------------------------------------------------------------------------------------------------------------------------------------------------------------------------------------------------------------------------------------------------------------------------------------------------------------------------------------------------------------------------------------------------------------------------------------------------------------------------------------------------------------------------------------------------------------------------------------|

|  |                                                                                                                  |  |  |                                                                                                                                                                                                                                                                                                                                                                                                                                                                                                                                                                                                                                                                                                                                                                                                                                                                                                                                                                                                                                                                                                                                                                 |
|--|------------------------------------------------------------------------------------------------------------------|--|--|-----------------------------------------------------------------------------------------------------------------------------------------------------------------------------------------------------------------------------------------------------------------------------------------------------------------------------------------------------------------------------------------------------------------------------------------------------------------------------------------------------------------------------------------------------------------------------------------------------------------------------------------------------------------------------------------------------------------------------------------------------------------------------------------------------------------------------------------------------------------------------------------------------------------------------------------------------------------------------------------------------------------------------------------------------------------------------------------------------------------------------------------------------------------|
|  | <p>"physician*".ti,ab. OR<br/> "relief work*".ti,ab. OR<br/> "rescuer*".ti,ab. OR<br/> "rescue work*".ti,ab.</p> |  |  | <p>"job length*".ti,ab. OR<br/> "job retenti*".ti,ab. OR<br/> "job satisf*".ti,ab. OR<br/> "work satisf*".ti,ab. OR<br/> "medical certificate*".ti,ab. OR<br/> "presenteeism*".ti,ab. OR<br/> "productivit*".ti,ab. OR<br/> "prolonged work*".ti,ab. OR<br/> "prolonging work*".ti,ab. OR<br/> "resignati*".ti,ab. OR<br/> "return to work".ti,ab. OR<br/> "sick leav*".ti,ab. OR<br/> "sickness absen*".ti,ab. OR<br/> "sickness presen*".ti,ab. OR<br/> "sick listing*".ti,ab. OR<br/> "sustainable work*".ti,ab. OR<br/> "sustained work*".ti,ab. OR<br/> "unemploy*".ti,ab. OR<br/> "work absence*".ti,ab. OR<br/> "work abilit*".ti,ab. OR<br/> "work capacit*".ti,ab. OR<br/> "work disabilit*".ti,ab. OR<br/> "work engag*".ti,ab. OR<br/> "work function*".ti,ab. OR<br/> "work participati*".ti,ab. OR<br/> "work performan*".ti,ab. OR<br/> "work retention".ti,ab. OR<br/> "turnover*".ti,ab. OR<br/> "turn over*".ti,ab.</p> <p>OR</p> <p>"drop out*".ti,ab. OR<br/> "dropout*".ti,ab.</p> <p>OR</p> <p>"Optimism".mh. OR<br/> "Personal Satisfaction".mh. OR<br/> "Satisfaction".sh. OR<br/> "Self Concept".mh. OR<br/> "Self Efficacy".mh. OR</p> |
|--|------------------------------------------------------------------------------------------------------------------|--|--|-----------------------------------------------------------------------------------------------------------------------------------------------------------------------------------------------------------------------------------------------------------------------------------------------------------------------------------------------------------------------------------------------------------------------------------------------------------------------------------------------------------------------------------------------------------------------------------------------------------------------------------------------------------------------------------------------------------------------------------------------------------------------------------------------------------------------------------------------------------------------------------------------------------------------------------------------------------------------------------------------------------------------------------------------------------------------------------------------------------------------------------------------------------------|

|  |  |  |  |                                                                                                                                                                                                                                                                                                                                                                                                                                                                                                                                                                                                                                                                                                                                                                                                                                                                                                                                                                                                                                                                                                                                                     |
|--|--|--|--|-----------------------------------------------------------------------------------------------------------------------------------------------------------------------------------------------------------------------------------------------------------------------------------------------------------------------------------------------------------------------------------------------------------------------------------------------------------------------------------------------------------------------------------------------------------------------------------------------------------------------------------------------------------------------------------------------------------------------------------------------------------------------------------------------------------------------------------------------------------------------------------------------------------------------------------------------------------------------------------------------------------------------------------------------------------------------------------------------------------------------------------------------------|
|  |  |  |  | <p>"Self-Control".mh. OR<br/> "life engag*".ti,ab. OR<br/> "life satisf*".ti,ab. OR<br/> "meaning of life".ti,ab. OR<br/> "purpose in life".ti,ab. OR<br/> "positive affect*".ti,ab. OR<br/> "positive emotion*".ti,ab. OR<br/> "resilien*".ti,ab. OR<br/> "self concept*".ti,ab. OR<br/> "self control*".ti,ab. OR<br/> "self efficac*".ti,ab. OR<br/> "self esteem*".ti,ab. OR<br/> "swb".ti,ab. OR<br/> "well being*".ti,ab. OR<br/> "wellbeing*".ti,ab.</p> <p>OR</p> <p>"Quality of Life".mh. OR<br/> "Quality-Adjusted Life Years".mh. OR<br/> "disability adjusted life".ti,ab. OR<br/> "qaly".ti,ab. OR<br/> "daly".ti,ab. OR<br/> "functioning".ti,ab. OR<br/> "functional abilit*" OR<br/> "functionalit*" OR<br/> "hrqol*".ti,ab. OR<br/> "life activit*".ti,ab. OR<br/> "life participati*".ti,ab. OR<br/> "life stress*".ti,ab. OR<br/> "qol".ti,ab. OR<br/> "qoli".ti,ab. OR<br/> "quality of life*".ti,ab. OR<br/> "self car*".ti,ab. OR<br/> "selfcar*".ti,ab. OR<br/> "sickness impact profile*".ti,ab. OR<br/> "social function*".ti,ab. OR<br/> "social participati*".ti,ab.</p> <p>OR</p> <p>"Help-Seeking Behavior".mh. OR</p> |
|--|--|--|--|-----------------------------------------------------------------------------------------------------------------------------------------------------------------------------------------------------------------------------------------------------------------------------------------------------------------------------------------------------------------------------------------------------------------------------------------------------------------------------------------------------------------------------------------------------------------------------------------------------------------------------------------------------------------------------------------------------------------------------------------------------------------------------------------------------------------------------------------------------------------------------------------------------------------------------------------------------------------------------------------------------------------------------------------------------------------------------------------------------------------------------------------------------|

|                          |                                                                                                                                                                                                                                                                                                                                                                                                                                                                                                                                                                                                                                                                                                                                                                                             |                                                                                                                                                                                                                                                                                                                                                                                                                                      |                                                                                                                                                                                                                                                                                                                                                                                                                                                                                                                                                                                                                                                                                                                                                                                                     |                                                                                                                                                                                                                                                                                                                                                                                                                                                                                                                                                                                                                                                                                                                                                                                                                                                                                                                                                                   |
|--------------------------|---------------------------------------------------------------------------------------------------------------------------------------------------------------------------------------------------------------------------------------------------------------------------------------------------------------------------------------------------------------------------------------------------------------------------------------------------------------------------------------------------------------------------------------------------------------------------------------------------------------------------------------------------------------------------------------------------------------------------------------------------------------------------------------------|--------------------------------------------------------------------------------------------------------------------------------------------------------------------------------------------------------------------------------------------------------------------------------------------------------------------------------------------------------------------------------------------------------------------------------------|-----------------------------------------------------------------------------------------------------------------------------------------------------------------------------------------------------------------------------------------------------------------------------------------------------------------------------------------------------------------------------------------------------------------------------------------------------------------------------------------------------------------------------------------------------------------------------------------------------------------------------------------------------------------------------------------------------------------------------------------------------------------------------------------------------|-------------------------------------------------------------------------------------------------------------------------------------------------------------------------------------------------------------------------------------------------------------------------------------------------------------------------------------------------------------------------------------------------------------------------------------------------------------------------------------------------------------------------------------------------------------------------------------------------------------------------------------------------------------------------------------------------------------------------------------------------------------------------------------------------------------------------------------------------------------------------------------------------------------------------------------------------------------------|
|                          |                                                                                                                                                                                                                                                                                                                                                                                                                                                                                                                                                                                                                                                                                                                                                                                             |                                                                                                                                                                                                                                                                                                                                                                                                                                      |                                                                                                                                                                                                                                                                                                                                                                                                                                                                                                                                                                                                                                                                                                                                                                                                     | "helpseek*".ti,ab. OR<br>"help seek*".ti,ab. OR<br>"help-seek*".ti,ab. OR<br>"seek help".ti,ab. OR<br>"seeking help".ti,ab. OR<br>"seek treatment".ti,ab. OR<br>"seeking treatment".ti,ab. OR<br>"treatment seeking".ti,ab. OR<br>"help seeking behav*".ti,ab.                                                                                                                                                                                                                                                                                                                                                                                                                                                                                                                                                                                                                                                                                                    |
| <b>EMABSE<br/>(Ovid)</b> | "named groups by<br>occupation".sh. OR<br>"Occupational Health".sh. OR<br>"enterprise*".ti,ab. OR<br>"business*".ti,ab. OR<br>"employed".ti,ab. OR<br>"employee*".ti,ab. OR<br>"employer*".ti,ab. OR<br>"employment*".ti,ab. OR<br>"informal sector*".ti,ab. OR<br>"informal work*".ti,ab. OR<br>"laborer*".ti,ab. OR<br>"labourer*".ti,ab. OR<br>"occupation*".ti,ab. OR<br>"personnel*".ti,ab. OR<br>"professional".ti,ab. OR<br>"professionals".ti,ab. OR<br>"staff".ti,ab. OR<br>"staffing*".ti,ab. OR<br>"vocation".ti,ab. OR<br>"vocations".ti,ab. OR<br>"worker*".ti,ab. OR<br>"workforce".ti,ab. OR<br>"workplace*".ti,ab. OR<br>"work place*".ti,ab. OR<br>"worksite*".ti,ab.<br><br>OR<br><br>"ambulance*".ti,ab. OR<br>"paramedic*".ti,ab. OR<br>"disaster responder*".ti,ab. OR | (screen*.ti,ab. OR<br>monitoring.ti,ab. OR<br>check.ti,ab. OR<br>check-up.ti,ab. OR<br>surveillance.ti,ab. OR<br>detection.ti,ab.)<br><br>AND<br><br>("employee*".ti,ab. OR<br>"laborer*".ti,ab. OR<br>"labourer*".ti,ab. OR<br>"personnel*".ti,ab. OR<br>"professionals".ti,ab.<br>OR "staff".ti,ab. OR<br>"worker*".ti,ab. OR<br>"workforce".ti,ab. OR<br>"workplace*".ti,ab. OR<br>"work place*".ti,ab. OR<br>"worksite*".ti,ab.) | "Randomized Controlled Trial".pt. OR<br>"Randomized Controlled Trials as Topic".sh. OR<br>"Non-Randomized Controlled Trials as Topic".sh. OR<br>"Random Allocation".sh. OR<br>"RCT".ti,ab. OR<br>"randomized controlled trial".ti,ab. OR<br>"randomised controlled trial".ti,ab. OR<br>"non-randomised controlled trial".ti,ab. OR<br>"non-randomised controlled trial".ti,ab. OR<br>"non randomized controlled trial".ti,ab. OR<br>"non randomised controlled trial".ti,ab. OR<br>"random allocation".ti,ab. OR<br>"random assignment".ti,ab. OR<br>"randomized".ti,ab. OR<br>"randomised".ti,ab. OR<br>"quasi-experiment*".ti,ab. OR<br>"quasi experiment*".ti,ab. OR<br>"control group".ti,ab. OR<br>"comparison group".ti,ab. OR<br>"wait-list control".ti,ab. OR<br>"control condition".ti,ab. | "Mental Disease".sh. OR<br>"Mental Health".sh. OR<br>"mental stress".sh. OR<br>"adjustment".ti,ab. OR<br>"affective disorder*".ti,ab. OR<br>"anxiet*".ti,ab. OR<br>"bipolar*".ti,ab. OR<br>"burn out*".ti,ab. OR<br>"burnout*".ti,ab. OR<br>"CMD".ti,ab. OR<br>"depressi*".ti,ab. OR<br>"eating disorder*".ti,ab. OR<br>"mental disorder*".ti,ab. OR<br>"mental health*".ti,ab. OR<br>"mental illness*".ti,ab. OR<br>"mood disorder*".ti,ab. OR<br>"obsessive compulsive disorder*".ti,ab. OR<br>"ocd".ti,ab. OR<br>"panic disorder*".ti,ab. OR<br>"phobi*".ti,ab. OR<br>"post traumatic*".ti,ab. OR<br>"psychiatric diagnos*".ti,ab. OR<br>"psychiatric disease*".ti,ab. OR<br>"psychiatric disorder*".ti,ab. OR<br>"psychiatric illness*".ti,ab. OR<br>"psychological disorder*".ti,ab. OR<br>"psychos*".ti,ab. OR<br>"psychotic*".ti,ab. OR<br>"psychological distress*".ti,ab. OR<br>"ptsd".ti,ab. OR<br>"ptss".ti,ab. OR<br>"somatoform disorder*".ti,ab. OR |



|  |                                                                                                                                                                                                                                                                                                                                                                                                                                                                                                                                                                                                                                                                                                                                                                                                                                                                                                                                                                                                     |  |  |                                                                                                                                                                                                                                                                                                                                                                                                                                                                                                                                                                                                                                                                                                                                                                                                                                                                                                                                                                                                                                                                                                                                                                            |
|--|-----------------------------------------------------------------------------------------------------------------------------------------------------------------------------------------------------------------------------------------------------------------------------------------------------------------------------------------------------------------------------------------------------------------------------------------------------------------------------------------------------------------------------------------------------------------------------------------------------------------------------------------------------------------------------------------------------------------------------------------------------------------------------------------------------------------------------------------------------------------------------------------------------------------------------------------------------------------------------------------------------|--|--|----------------------------------------------------------------------------------------------------------------------------------------------------------------------------------------------------------------------------------------------------------------------------------------------------------------------------------------------------------------------------------------------------------------------------------------------------------------------------------------------------------------------------------------------------------------------------------------------------------------------------------------------------------------------------------------------------------------------------------------------------------------------------------------------------------------------------------------------------------------------------------------------------------------------------------------------------------------------------------------------------------------------------------------------------------------------------------------------------------------------------------------------------------------------------|
|  | <p>"doctor*".ti,ab. OR<br/> "emergency service*".ti,ab. OR<br/> "emergency responder*".ti,ab. OR<br/> OR<br/> "emergency medical".ti,ab. OR<br/> "firefighter*".ti,ab. OR<br/> "fire fighter*".ti,ab. OR<br/> "first responder*".ti,ab. OR<br/> "general practitioner*".ti,ab. OR<br/> "health care provider*".ti,ab. OR<br/> "healthcare provider*".ti,ab. OR<br/> "humanitarian aid*".ti,ab. OR<br/> "humanitarian relie*".ti,ab. OR<br/> "humanitarian service*".ti,ab. OR<br/> "humanitarian worker*".ti,ab. OR<br/> "medical resident*".ti,ab. OR<br/> "medic".ti,ab. OR<br/> "medics".ti,ab. OR<br/> "nurse*".ti,ab. OR<br/> "nursing".ti,ab. OR<br/> "paramedic*".ti,ab. OR<br/> "police*".ti,ab. OR<br/> "police m*".ti,ab. OR<br/> "police wom*".ti,ab. OR<br/> "police officer*".ti,ab. OR<br/> "firem*".ti,ab. OR<br/> "fire m*".ti,ab. OR<br/> "fire wom*".ti,ab. OR<br/> "physician*".ti,ab. OR<br/> "relief work*".ti,ab. OR<br/> "rescuer*".ti,ab. OR<br/> "rescue work*".ti,ab.</p> |  |  | <p>"schizophren*".ti,ab. OR<br/> "stress*".ti,ab.<br/> <br/> OR<br/> <br/> "User satisfaction".ti,ab. OR<br/> "acceptability".ti,ab. OR<br/> "feasibility".ti,ab.<br/> <br/> OR<br/> <br/> "Absenteeism".sh. OR<br/> "Employment".sh. OR<br/> "Job Satisfaction".sh. OR<br/> "Medical Leave".sh. OR<br/> "Retirement".sh. OR<br/> "Work Capacity".sh. OR<br/> "absenteeism*".ti,ab. OR<br/> "back to work".ti,ab. OR<br/> "early retir*".ti,ab. OR<br/> "effectiveness".ti,ab. OR<br/> "employabil*".ti,ab. OR<br/> "employment status*".ti,ab. OR<br/> "job length*".ti,ab. OR<br/> "job retenti*".ti,ab. OR<br/> "job satisf*".ti,ab. OR<br/> "work satisf*".ti,ab. OR<br/> "medical certificate*".ti,ab. OR<br/> "presenteeism*".ti,ab. OR<br/> "productivit*".ti,ab. OR<br/> "prolonged work*".ti,ab. OR<br/> "prolonging work*".ti,ab. OR<br/> "resignati*".ti,ab. OR<br/> "return to work".ti,ab. OR<br/> "sick leav*".ti,ab. OR<br/> "sickness absen*".ti,ab. OR<br/> "sickness presen*".ti,ab. OR<br/> "sick listing*".ti,ab. OR<br/> "sustainable work*".ti,ab. OR<br/> "sustained work*".ti,ab. OR<br/> "unemploy*".ti,ab. OR<br/> "work absence*".ti,ab. OR</p> |
|--|-----------------------------------------------------------------------------------------------------------------------------------------------------------------------------------------------------------------------------------------------------------------------------------------------------------------------------------------------------------------------------------------------------------------------------------------------------------------------------------------------------------------------------------------------------------------------------------------------------------------------------------------------------------------------------------------------------------------------------------------------------------------------------------------------------------------------------------------------------------------------------------------------------------------------------------------------------------------------------------------------------|--|--|----------------------------------------------------------------------------------------------------------------------------------------------------------------------------------------------------------------------------------------------------------------------------------------------------------------------------------------------------------------------------------------------------------------------------------------------------------------------------------------------------------------------------------------------------------------------------------------------------------------------------------------------------------------------------------------------------------------------------------------------------------------------------------------------------------------------------------------------------------------------------------------------------------------------------------------------------------------------------------------------------------------------------------------------------------------------------------------------------------------------------------------------------------------------------|

|  |  |  |  |                                                                                                                                                                                                                                                                                                                                                                                                                                                                                                                                                                                                                                                                                                                                                                                                                                                                                                                                                                                                                                                                            |
|--|--|--|--|----------------------------------------------------------------------------------------------------------------------------------------------------------------------------------------------------------------------------------------------------------------------------------------------------------------------------------------------------------------------------------------------------------------------------------------------------------------------------------------------------------------------------------------------------------------------------------------------------------------------------------------------------------------------------------------------------------------------------------------------------------------------------------------------------------------------------------------------------------------------------------------------------------------------------------------------------------------------------------------------------------------------------------------------------------------------------|
|  |  |  |  | <p>"work abilit*" .ti,ab. OR<br/>"work capacit*" .ti,ab. OR<br/>"work disabilit*" .ti,ab. OR<br/>"work engag*" .ti,ab. OR<br/>"work function*" .ti,ab. OR<br/>"work participati*" .ti,ab. OR<br/>"work performan*" .ti,ab. OR<br/>"work retention" .ti,ab. OR<br/>"turnover*" .ti,ab. OR<br/>"turn over*" .ti,ab.</p> <p>OR</p> <p>"drop out*" .ti,ab. OR<br/>"dropout*" .ti,ab.</p> <p>OR</p> <p>"Optimism" .sh. OR<br/>"Satisfaction" .sh. OR<br/>"Self Concept" .sh. OR<br/>"Self Control" .sh. OR<br/>"life engag*" .ti,ab. OR<br/>"life satisf*" .ti,ab. OR<br/>"meaning of life" .ti,ab. OR<br/>"purpose in life" .ti,ab. OR<br/>"positive affect*" .ti,ab. OR<br/>"positive emotion*" .ti,ab. OR<br/>"resilien*" .ti,ab. OR<br/>"self concept*" .ti,ab. OR<br/>"self control*" .ti,ab. OR<br/>"self efficac*" .ti,ab. OR<br/>"self esteem*" .ti,ab. OR<br/>"swb" .ti,ab. OR<br/>"well being*" .ti,ab. OR<br/>"wellbeing*" .ti,ab.</p> <p>OR</p> <p>"Quality of Life" .sh. OR<br/>"Quality-Adjusted Life Year" .sh. OR<br/>"disability adjusted life" .ti,ab. OR</p> |
|--|--|--|--|----------------------------------------------------------------------------------------------------------------------------------------------------------------------------------------------------------------------------------------------------------------------------------------------------------------------------------------------------------------------------------------------------------------------------------------------------------------------------------------------------------------------------------------------------------------------------------------------------------------------------------------------------------------------------------------------------------------------------------------------------------------------------------------------------------------------------------------------------------------------------------------------------------------------------------------------------------------------------------------------------------------------------------------------------------------------------|

|                |                                                                                                                                                                                                                                                                           |                                                                                                                                                                      |                                                                                                                                                                                                                                                                                                                                                                                                                                                               |                                                                                                                                                                                                                                                                                                                                                                                                                                                                                                                                                                                                                                                                                                                                                                                                                                             |
|----------------|---------------------------------------------------------------------------------------------------------------------------------------------------------------------------------------------------------------------------------------------------------------------------|----------------------------------------------------------------------------------------------------------------------------------------------------------------------|---------------------------------------------------------------------------------------------------------------------------------------------------------------------------------------------------------------------------------------------------------------------------------------------------------------------------------------------------------------------------------------------------------------------------------------------------------------|---------------------------------------------------------------------------------------------------------------------------------------------------------------------------------------------------------------------------------------------------------------------------------------------------------------------------------------------------------------------------------------------------------------------------------------------------------------------------------------------------------------------------------------------------------------------------------------------------------------------------------------------------------------------------------------------------------------------------------------------------------------------------------------------------------------------------------------------|
|                |                                                                                                                                                                                                                                                                           |                                                                                                                                                                      |                                                                                                                                                                                                                                                                                                                                                                                                                                                               | <p>"qaly".ti,ab. OR<br/> "daly".ti,ab. OR<br/> "functioning".ti,ab. OR<br/> "functional abilit*" OR<br/> "functionalit*" OR<br/> "hrqol*".ti,ab. OR<br/> "life activit*".ti,ab. OR<br/> "life participati*".ti,ab. OR<br/> "life stress*".ti,ab. OR<br/> "qol".ti,ab. OR<br/> "qoli".ti,ab. OR<br/> "quality of life*".ti,ab. OR<br/> "self car*".ti,ab. OR<br/> "selfcar*".ti,ab. OR<br/> "sickness impact profile*".ti,ab. OR<br/> "social function*".ti,ab. OR<br/> "social participati*".ti,ab.</p> <p>OR</p> <p>"Help-Seeking Behavior".sh. OR<br/> "helpseek*".ti,ab. OR<br/> "help seek*".ti,ab. OR<br/> "help-seek*".ti,ab. OR<br/> "seek help".ti,ab. OR<br/> "seeking help".ti,ab. OR<br/> "seek treatment".ti,ab. OR<br/> "seeking treatment".ti,ab. OR<br/> "treatment seeking".ti,ab. OR<br/> "help seeking behav*".ti,ab.</p> |
| <b>CENTRAL</b> | <p>[mh "Occupational Groups"] OR<br/> [mh "Occupational Health"] OR<br/> "enterprise*" OR<br/> "business*" OR<br/> "employed" OR<br/> "employee*" OR<br/> "employer*" OR<br/> "employment*" OR<br/> "informal sector*" OR<br/> "informal work*" OR<br/> "laborer*" OR</p> | <p>(screen* OR<br/> monitoring OR<br/> check OR<br/> check-up OR<br/> surveillance OR<br/> detection)<br/><br/> AND<br/><br/> ("employee*" OR<br/> "laborer*" OR</p> | <p>("Randomized Controlled Trial"):pt OR<br/> [mh "Randomized Controlled Trials as Topic"] OR<br/> [mh "Non-Randomized Controlled Trials as Topic"] OR<br/> [mh "Random Allocation"] OR<br/> "RCT" OR<br/> "randomized controlled trial" OR<br/> "randomised controlled trial" OR<br/> "non-randomized controlled trial" OR<br/> "non-randomised controlled trial" OR<br/> "non randomized controlled trial" OR<br/> "non randomised controlled trial" OR</p> | <p>[mh "Mental Disorders"] OR<br/> [mh "Mental Health"] OR<br/> [mh "Psychology, Industrial"] OR<br/> [mh "Stress, Psychological"] OR<br/> "adjustment" OR<br/> " affective disorder*" OR<br/> "anxiet*" OR<br/> "bipolar*" OR<br/> "burn out*" OR<br/> "burnout*" OR<br/> "CMD" OR</p>                                                                                                                                                                                                                                                                                                                                                                                                                                                                                                                                                     |

|                                                                                                                                                                                                                                                                                                                                                                                                                                                                                                                                                                                                                                                                                                                                                                                                                                                                                                                                                            |                                                                                                                                                                                       |                                                                                                                                                                                                                                                                                                 |                                                                                                                                                                                                                                                                                                                                                                                                                                                                                                                                                                                                                                                                                                                                                                                                                                                                                                                                                                                         |
|------------------------------------------------------------------------------------------------------------------------------------------------------------------------------------------------------------------------------------------------------------------------------------------------------------------------------------------------------------------------------------------------------------------------------------------------------------------------------------------------------------------------------------------------------------------------------------------------------------------------------------------------------------------------------------------------------------------------------------------------------------------------------------------------------------------------------------------------------------------------------------------------------------------------------------------------------------|---------------------------------------------------------------------------------------------------------------------------------------------------------------------------------------|-------------------------------------------------------------------------------------------------------------------------------------------------------------------------------------------------------------------------------------------------------------------------------------------------|-----------------------------------------------------------------------------------------------------------------------------------------------------------------------------------------------------------------------------------------------------------------------------------------------------------------------------------------------------------------------------------------------------------------------------------------------------------------------------------------------------------------------------------------------------------------------------------------------------------------------------------------------------------------------------------------------------------------------------------------------------------------------------------------------------------------------------------------------------------------------------------------------------------------------------------------------------------------------------------------|
| <p>"labourer*" OR<br/> "occupation*" OR<br/> "personnel*" OR<br/> "professional" OR<br/> "professionals" OR<br/> "staff" OR<br/> "staffing*" OR<br/> "vocation" OR<br/> "vocations" OR<br/> "worker*" OR<br/> "workforce" OR<br/> "workplace*" OR<br/> "work place*" OR<br/> "worksite*" OR</p> <p>OR</p> <p>"ambulance*" OR<br/> "paramedic*" OR<br/> "disaster responder*" OR<br/> "doctor*" OR<br/> "emergency service*" OR<br/> "emergency responder*" OR<br/> "emergency medical" OR<br/> "firefighter*" OR<br/> "fire fighter*" OR<br/> "first responder*" OR<br/> "general practitioner*" OR<br/> "health care provider*" OR<br/> "healthcare provider*" OR<br/> "humanitarian aid*" OR<br/> "humanitarian relie*" OR<br/> "humanitarian service*" OR<br/> "humanitarian worker*" OR<br/> "medical resident*" OR<br/> "medic" OR<br/> "medics" OR<br/> "nurse*" OR<br/> "nursing" OR<br/> "paramedic*" OR<br/> "police*" OR<br/> "police m*" OR</p> | <p>"labourer*" OR<br/> "personnel*" OR<br/> "professionals" OR<br/> "staff" OR<br/> "worker*" OR<br/> "workforce" OR<br/> "workplace*" OR<br/> "work place*" OR<br/> "worksite*")</p> | <p>"random allocation" OR<br/> "random assignment" OR<br/> "randomized" OR<br/> "randomised" OR<br/> "quasi-experiment*" OR<br/> "quasi experiment*" OR<br/> "control group" OR<br/> "comparison group" OR<br/> "wait-list control" OR<br/> "wait list control" OR<br/> "control condition"</p> | <p>"depressi*" OR<br/> "eating disorder*" OR<br/> "mental disorder*" OR<br/> "mental health*" OR<br/> "mental illness*" OR<br/> "mood disorder*" OR<br/> "obsessive compulsive disorder*" OR<br/> "ocd" OR<br/> "panic disorder*" OR<br/> "phobi*" OR<br/> "post traumatic*" OR<br/> "psychiatric diagnos*" OR<br/> "psychiatric disease*" OR<br/> "psychiatric disorder*" OR<br/> "psychiatric illness*" OR<br/> "psychological disorder*" OR<br/> "psychos*" OR<br/> "psychotic*" OR<br/> "psychological distress*" OR<br/> "ptsd" OR<br/> "ptss" OR<br/> "somatiform disorder*" OR<br/> "schizophren*" OR<br/> "stress*" OR</p> <p>OR</p> <p>"User satisfaction" OR<br/> "acceptability" OR<br/> "feasibility"</p> <p>OR</p> <p>[mh "Absenteeism"] OR<br/> [mh "Employment"] OR<br/> [mh "Job Satisfaction"] OR<br/> [mh "Sick Leave"] OR<br/> [mh "Retirement"] OR<br/> [mh "Work Capacity Evaluation"] OR<br/> "absenteeism*" OR<br/> "back to work" OR<br/> "early retir*" OR</p> |
|------------------------------------------------------------------------------------------------------------------------------------------------------------------------------------------------------------------------------------------------------------------------------------------------------------------------------------------------------------------------------------------------------------------------------------------------------------------------------------------------------------------------------------------------------------------------------------------------------------------------------------------------------------------------------------------------------------------------------------------------------------------------------------------------------------------------------------------------------------------------------------------------------------------------------------------------------------|---------------------------------------------------------------------------------------------------------------------------------------------------------------------------------------|-------------------------------------------------------------------------------------------------------------------------------------------------------------------------------------------------------------------------------------------------------------------------------------------------|-----------------------------------------------------------------------------------------------------------------------------------------------------------------------------------------------------------------------------------------------------------------------------------------------------------------------------------------------------------------------------------------------------------------------------------------------------------------------------------------------------------------------------------------------------------------------------------------------------------------------------------------------------------------------------------------------------------------------------------------------------------------------------------------------------------------------------------------------------------------------------------------------------------------------------------------------------------------------------------------|

|  |                                                                                                                                                                                             |  |  |                                                                                                                                                                                                                                                                                                                                                                                                                                                                                                                                                                                                                                                                                                                                                                                                                                                                                                                                   |
|--|---------------------------------------------------------------------------------------------------------------------------------------------------------------------------------------------|--|--|-----------------------------------------------------------------------------------------------------------------------------------------------------------------------------------------------------------------------------------------------------------------------------------------------------------------------------------------------------------------------------------------------------------------------------------------------------------------------------------------------------------------------------------------------------------------------------------------------------------------------------------------------------------------------------------------------------------------------------------------------------------------------------------------------------------------------------------------------------------------------------------------------------------------------------------|
|  | <p>"police wom*" OR<br/> "police officer*" OR<br/> "firem*" OR<br/> "fire m*" OR<br/> "fire wom*" OR<br/> "physician*" OR<br/> "relief work*" OR<br/> "rescuer*" OR<br/> "rescue work*"</p> |  |  | <p>"effectiveness" OR<br/> "employabil*" OR<br/> "employment status*" OR<br/> "job length*" OR<br/> "job retenti*" OR<br/> "job satisf*" OR<br/> "work satisf*" OR<br/> "medical certificate*" OR<br/> "presenteeism*" OR<br/> "productivit*" OR<br/> "prolonged work*" OR<br/> "prolonging work*" OR<br/> "resignati*" OR<br/> "return to work" OR<br/> "sick leav*" OR<br/> "sickness absen*" OR<br/> "sickness presen*" OR<br/> "sick listing*" OR<br/> "sustainable work*" OR<br/> "sustained work*" OR<br/> "unemploy*" OR<br/> "work absence*" OR<br/> "work abilit*" OR<br/> "work capacit*" OR<br/> "work disabilit*" OR<br/> "work engag*" OR<br/> "work function*" OR<br/> "work participati*" OR<br/> "work performan*" OR<br/> "work retention" OR<br/> "turnover*" OR<br/> "turn over*"</p> <p>OR</p> <p>"drop out*" OR<br/> "dropout*"</p> <p>OR</p> <p>[mh "Optimism"] OR<br/> [mh "Personal Satisfaction"] OR</p> |
|--|---------------------------------------------------------------------------------------------------------------------------------------------------------------------------------------------|--|--|-----------------------------------------------------------------------------------------------------------------------------------------------------------------------------------------------------------------------------------------------------------------------------------------------------------------------------------------------------------------------------------------------------------------------------------------------------------------------------------------------------------------------------------------------------------------------------------------------------------------------------------------------------------------------------------------------------------------------------------------------------------------------------------------------------------------------------------------------------------------------------------------------------------------------------------|

|  |  |  |  |                                                                                                                                                                                                                                                                                                                                                                                                                                                                                                                                                                                                                                                                                                                                                                                                                                                                                                                                                         |
|--|--|--|--|---------------------------------------------------------------------------------------------------------------------------------------------------------------------------------------------------------------------------------------------------------------------------------------------------------------------------------------------------------------------------------------------------------------------------------------------------------------------------------------------------------------------------------------------------------------------------------------------------------------------------------------------------------------------------------------------------------------------------------------------------------------------------------------------------------------------------------------------------------------------------------------------------------------------------------------------------------|
|  |  |  |  | <p>[mh "Self Concept"] OR<br/> [mh "Self Efficacy"] OR<br/> [mh "Self-Control"] OR<br/> "life engag*" OR<br/> "life satisf*" OR<br/> "meaning of life" OR<br/> "purpose in life" OR<br/> "positive affect*" OR<br/> "positive emotion*" OR<br/> "resilien*" OR<br/> "self concept*" OR<br/> "self control*" OR<br/> "self efficac*" OR<br/> "self esteem*" OR<br/> "swb" OR<br/> "well being*" OR<br/> "wellbeing*"</p> <p>OR</p> <p>[mh "Quality of Life"] OR<br/> [mh "Quality-Adjusted Life Years"] OR<br/> "disability adjusted life" OR<br/> "qaly" OR<br/> "daly" OR<br/> "functioning" OR<br/> "functional abilit*" OR<br/> "functionalit*" OR<br/> "hrqol*" OR<br/> "life activit*" OR<br/> "life participati*" OR<br/> "life stress*" OR<br/> "qol" OR<br/> "qoli" OR<br/> "quality of life*" OR<br/> "self car*" OR<br/> "selfcar*" OR<br/> "sickness impact profile*" OR<br/> "social function*" OR<br/> "social participati*"</p> <p>OR</p> |
|--|--|--|--|---------------------------------------------------------------------------------------------------------------------------------------------------------------------------------------------------------------------------------------------------------------------------------------------------------------------------------------------------------------------------------------------------------------------------------------------------------------------------------------------------------------------------------------------------------------------------------------------------------------------------------------------------------------------------------------------------------------------------------------------------------------------------------------------------------------------------------------------------------------------------------------------------------------------------------------------------------|

|                             |                                                                                                                                                                                                                                                                                                                                                                                                                                                                                                                                                                                              |                                                                                                                                                                                                                                                                                                               |                                                                                                                                                                                                                                                                                                                                                                                                                                                                                                                                                                                                                                                             |                                                                                                                                                                                                                                                                                                                                                                                                                                                                                                                                                                                                                                                                                                                        |
|-----------------------------|----------------------------------------------------------------------------------------------------------------------------------------------------------------------------------------------------------------------------------------------------------------------------------------------------------------------------------------------------------------------------------------------------------------------------------------------------------------------------------------------------------------------------------------------------------------------------------------------|---------------------------------------------------------------------------------------------------------------------------------------------------------------------------------------------------------------------------------------------------------------------------------------------------------------|-------------------------------------------------------------------------------------------------------------------------------------------------------------------------------------------------------------------------------------------------------------------------------------------------------------------------------------------------------------------------------------------------------------------------------------------------------------------------------------------------------------------------------------------------------------------------------------------------------------------------------------------------------------|------------------------------------------------------------------------------------------------------------------------------------------------------------------------------------------------------------------------------------------------------------------------------------------------------------------------------------------------------------------------------------------------------------------------------------------------------------------------------------------------------------------------------------------------------------------------------------------------------------------------------------------------------------------------------------------------------------------------|
|                             |                                                                                                                                                                                                                                                                                                                                                                                                                                                                                                                                                                                              |                                                                                                                                                                                                                                                                                                               |                                                                                                                                                                                                                                                                                                                                                                                                                                                                                                                                                                                                                                                             | [mh "Help-Seeking Behavior"] OR<br>"helpseek*" OR<br>"help seek*" OR<br>"help-seek*" OR<br>"seek help" OR<br>"seeking help" OR<br>"seek treatment" OR<br>"seeking treatment" OR<br>"treatment seeking" OR<br>"help seeking behav*"                                                                                                                                                                                                                                                                                                                                                                                                                                                                                     |
| <b>Global Index Medicus</b> | mh:(Occupational Groups) OR<br>mh:(Occupational Health) OR<br>"enterprise*" OR<br>"business*" OR<br>"employed" OR<br>"employee*" OR<br>"employer*" OR<br>"employment*" OR<br>"informal sector*" OR<br>"informal work*" OR<br>"laborer*" OR<br>"labourer*" OR<br>"occupation*" OR<br>"personnel*" OR<br>"professional" OR<br>"professionals" OR<br>"staff" OR<br>"staffing*" OR<br>"vocation" OR<br>"vocations" OR<br>"worker*" OR<br>"workforce" OR<br>"workplace*" OR<br>"work place*" OR<br>"worksite*" OR<br><br>OR<br><br>"ambulance*" OR<br>"paramedic*" OR<br>"disaster responder*" OR | (screen* OR<br>monitoring OR<br>check OR<br>check-up OR<br>surveillance OR<br>detection)<br><br>AND<br><br>("employee*" OR<br>"laborer*" OR<br>"labourer*" OR<br>"personnel*" OR<br>"professionals" OR<br>"staff" OR<br>"worker*" OR<br>"workforce" OR<br>"workplace*" OR<br>"work place*" OR<br>"worksite*") | mh:(Randomized Controlled Trials as Topic) OR<br>mh:(Non-Randomized Controlled Trials as Topic) OR<br>mh:(Random Allocation) OR<br>"RCT" OR<br>"randomized controlled trial" OR<br>"randomised controlled trial" OR<br>"non-randomized controlled trial" OR<br>"non-randomised controlled trial" OR<br>"non randomized controlled trial" OR<br>"non randomised controlled trial" OR<br>"random allocation" OR<br>"random assignment" OR<br>"randomized" OR<br>"randomised" OR<br>"quasi-experiment*" OR<br>"quasi experiment*" OR<br>"control group" OR<br>"comparison group" OR<br>"wait-list control" OR<br>"wait list control" OR<br>"control condition" | mh:(Mental Disease) OR<br>mh:(Mental Health) OR<br>mh:(mental stress) OR<br>"adjustment" OR<br>"affective disorder*" OR<br>"anxiet*" OR<br>"bipolar*" OR<br>"burn out*" OR<br>"burnout*" OR<br>"CMD" OR<br>"depressi*" OR<br>"eating disorder*" OR<br>"mental disorder*" OR<br>"mental health*" OR<br>"mental illness*" OR<br>"mood disorder*" OR<br>"obsessive compulsive disorder*" OR<br>"ocd" OR<br>"panic disorder*" OR<br>"phobi*" OR<br>"post traumatic*" OR<br>"psychiatric diagnos*" OR<br>"psychiatric disease*" OR<br>"psychiatric disorder*" OR<br>"psychiatric illness*" OR<br>"psychological disorder*" OR<br>"psychos*" OR<br>"psychotic*" OR<br>"psychological distress*" OR<br>"ptsd" OR<br>"ptss" OR |

|  |                                                                                                                                                                                                                                                                                                                                                                                                                                                                                                                                                                                                                                                                                                                                                                    |  |  |                                                                                                                                                                                                                                                                                                                                                                                                                                                                                                                                                                                                                                                                                                                                                                                                                                                                                                                                                       |
|--|--------------------------------------------------------------------------------------------------------------------------------------------------------------------------------------------------------------------------------------------------------------------------------------------------------------------------------------------------------------------------------------------------------------------------------------------------------------------------------------------------------------------------------------------------------------------------------------------------------------------------------------------------------------------------------------------------------------------------------------------------------------------|--|--|-------------------------------------------------------------------------------------------------------------------------------------------------------------------------------------------------------------------------------------------------------------------------------------------------------------------------------------------------------------------------------------------------------------------------------------------------------------------------------------------------------------------------------------------------------------------------------------------------------------------------------------------------------------------------------------------------------------------------------------------------------------------------------------------------------------------------------------------------------------------------------------------------------------------------------------------------------|
|  | <p>"doctor*" OR<br/> "emergency service*" OR<br/> "emergency responder*" OR<br/> "emergency medical" OR<br/> "firefighter*" OR<br/> "fire fighter*" OR<br/> "first responder*" OR<br/> "general practitioner*" OR<br/> "health care provider*" OR<br/> "healthcare provider*" OR<br/> "humanitarian aid*" OR<br/> "humanitarian relie*" OR<br/> "humanitarian service*" OR<br/> "humanitarian worker*" OR<br/> "medical resident*" OR<br/> "medic" OR<br/> "medics" OR<br/> "nurse*" OR<br/> "nursing" OR<br/> "paramedic*" OR<br/> "police*" OR<br/> "police m*" OR<br/> "police wom*" OR<br/> "police officer*" OR<br/> "firem*" OR<br/> "fire m*" OR<br/> "fire wom*" OR<br/> "physician*" OR<br/> "relief work*" OR<br/> "rescuer*" OR<br/> "rescue work*"</p> |  |  | <p>"somatoform disorder*" OR<br/> "schizophren*" OR<br/> "stress*"<br/><br/> OR<br/><br/> "User satisfaction" OR<br/> "acceptability" OR<br/> "feasibility"<br/><br/> OR<br/><br/> mh:(Absenteeism) OR<br/> mh:(Employment) OR<br/> mh:(Job Satisfaction) OR<br/> mh:(Medical Leave) OR<br/> mh:(Retirement) OR<br/> mh:(Work Capacity) OR<br/> "absenteeism*" OR<br/> "back to work" OR<br/> "early retir*" OR<br/> "effectiveness" OR<br/> "employabil*" OR<br/> "employment status*" OR<br/> "job length*" OR<br/> "job retenti*" OR<br/> "job satisf*" OR<br/> "work satisf*" OR<br/> "medical certificate*" OR<br/> "presenteeism*" OR<br/> "productivit*" OR<br/> "prolonged work*" OR<br/> "prolonging work*" OR<br/> "resignati*" OR<br/> "return to work" OR<br/> "sick leav*" OR<br/> "sickness absen*" OR<br/> "sickness presen*" OR<br/> "sick listing*" OR<br/> "sustainable work*" OR<br/> "sustained work*" OR<br/> "unemploy*" OR</p> |
|--|--------------------------------------------------------------------------------------------------------------------------------------------------------------------------------------------------------------------------------------------------------------------------------------------------------------------------------------------------------------------------------------------------------------------------------------------------------------------------------------------------------------------------------------------------------------------------------------------------------------------------------------------------------------------------------------------------------------------------------------------------------------------|--|--|-------------------------------------------------------------------------------------------------------------------------------------------------------------------------------------------------------------------------------------------------------------------------------------------------------------------------------------------------------------------------------------------------------------------------------------------------------------------------------------------------------------------------------------------------------------------------------------------------------------------------------------------------------------------------------------------------------------------------------------------------------------------------------------------------------------------------------------------------------------------------------------------------------------------------------------------------------|



|  |  |  |  |                                                                                                                                                                                                                                                                                                                                                                                                                                                                                                                                                                                                                                                                                                                                                                                                                             |
|--|--|--|--|-----------------------------------------------------------------------------------------------------------------------------------------------------------------------------------------------------------------------------------------------------------------------------------------------------------------------------------------------------------------------------------------------------------------------------------------------------------------------------------------------------------------------------------------------------------------------------------------------------------------------------------------------------------------------------------------------------------------------------------------------------------------------------------------------------------------------------|
|  |  |  |  | <p>"work absence*" OR<br/>"work abilit*" OR<br/>"work capacit*" OR<br/>"work disabilit*" OR<br/>"work engag*" OR<br/>"work function*" OR<br/>"work participati*" OR<br/>"work performan*" OR<br/>"work retention" OR<br/>"turnover*" OR<br/>"turn over*"</p> <p>OR</p> <p>"drop out*" OR<br/>"dropout*"</p> <p>OR</p> <p>mh:(Optimism) OR<br/>mh:(Satisfaction) OR<br/>mh:(Self Concept) OR<br/>mh:(Self Control) OR<br/>"life engag*" OR<br/>"life satisf*" OR<br/>"meaning of life" OR<br/>"purpose in life" OR<br/>"positive affect*" OR<br/>"positive emotion*" OR<br/>"resilien*" OR<br/>"self concept*" OR<br/>"self control*" OR<br/>"self efficac*" OR<br/>"self esteem*" OR<br/>"swb" OR<br/>"well being*" OR<br/>"wellbeing*"</p> <p>OR</p> <p>mh:(Quality of Life) OR<br/>mh:(Quality-Adjusted Life Year) OR</p> |
|--|--|--|--|-----------------------------------------------------------------------------------------------------------------------------------------------------------------------------------------------------------------------------------------------------------------------------------------------------------------------------------------------------------------------------------------------------------------------------------------------------------------------------------------------------------------------------------------------------------------------------------------------------------------------------------------------------------------------------------------------------------------------------------------------------------------------------------------------------------------------------|

|                      |                                                                                                                                                                                                                                                                                                                              |                                                                                                                                                                                                                        |                                                                                                                                                                                                                                                                                                                                                                                                                                                                                          |                                                                                                                                                                                                                                                                                                                                                                                                                                                                                                                                                                                                                                                                                                       |
|----------------------|------------------------------------------------------------------------------------------------------------------------------------------------------------------------------------------------------------------------------------------------------------------------------------------------------------------------------|------------------------------------------------------------------------------------------------------------------------------------------------------------------------------------------------------------------------|------------------------------------------------------------------------------------------------------------------------------------------------------------------------------------------------------------------------------------------------------------------------------------------------------------------------------------------------------------------------------------------------------------------------------------------------------------------------------------------|-------------------------------------------------------------------------------------------------------------------------------------------------------------------------------------------------------------------------------------------------------------------------------------------------------------------------------------------------------------------------------------------------------------------------------------------------------------------------------------------------------------------------------------------------------------------------------------------------------------------------------------------------------------------------------------------------------|
|                      |                                                                                                                                                                                                                                                                                                                              |                                                                                                                                                                                                                        |                                                                                                                                                                                                                                                                                                                                                                                                                                                                                          | <p>"disability adjusted life" OR<br/> "qaly" OR<br/> "daly" OR<br/> "functioning" OR<br/> "functional abilit*" OR<br/> "functionalit*" OR<br/> "hrqol*" OR<br/> "life activit*" OR<br/> "life participati*" OR<br/> "life stress*" OR<br/> "qol" OR<br/> "qoli" OR<br/> "quality of life*" OR<br/> "self car*" OR<br/> "selfcar*" OR<br/> "sickness impact profile*" OR<br/> "social function*" OR<br/> "social participati*"</p> <p>OR</p> <p>mh:(Help-Seeking Behavior) OR<br/> "helpseek*" OR<br/> "help seek*" OR<br/> "help-seek*" OR<br/> "seek help" OR<br/> "seeking help" OR<br/> "seek treatment" OR<br/> "seeking treatment" OR<br/> "treatment seeking" OR<br/> "help seeking behav*"</p> |
| <b>Global Health</b> | <p>"Occupational Health".sh. OR<br/> "Personnel".sh. OR<br/> "enterprise*".ti,ab. OR<br/> "business*".ti,ab. OR<br/> "employed".ti,ab. OR<br/> "employee*".ti,ab. OR<br/> "employer*".ti,ab. OR<br/> "employment*".ti,ab. OR<br/> "informal sector*".ti,ab. OR<br/> "informal work*".ti,ab. OR<br/> "laborer*".ti,ab. OR</p> | <p>(screen*.ti,ab. OR<br/> monitoring.ti,ab. OR<br/> check.ti,ab. OR<br/> check-up.ti,ab. OR<br/> surveillance.ti,ab. OR<br/> detection.ti,ab.)</p> <p>AND</p> <p>("employee*".ti,ab. OR<br/> "laborer*".ti,ab. OR</p> | <p>"Randomized Controlled Trial".pt. OR<br/> "Randomized Controlled Trials as Topic".sh. OR<br/> "RCT".ti,ab. OR<br/> "randomized controlled trial".ti,ab. OR<br/> "randomised controlled trial".ti,ab. OR<br/> "non-randomized controlled trial".ti,ab. OR<br/> "non-randomised controlled trial".ti,ab. OR<br/> "non randomized controlled trial".ti,ab. OR<br/> "non randomised controlled trial".ti,ab. OR<br/> "random allocation".ti,ab. OR<br/> "random assignment".ti,ab. OR</p> | <p>"Mental Disorders".sh. OR<br/> "Mental Health".sh. OR<br/> "Mental Stress".sh. OR<br/> "adjustment".ti,ab. OR<br/> "affective disorder*".ti,ab. OR<br/> "anxiet*".ti,ab. OR<br/> "bipolar*".ti,ab. OR<br/> "burn out*".ti,ab. OR<br/> "burnout*".ti,ab. OR<br/> "CMD".ti,ab. OR<br/> "depressi*".ti,ab. OR</p>                                                                                                                                                                                                                                                                                                                                                                                     |

|                                                                                                                                                                                                                                                                                                                                                                                                                                                                                                                                                                                                                                                                                                                                                                                                                                                                                                                                                                                                                                                                                                                                                                                                                        |                                                                                                                                                                                                                                                      |                                                                                                                                                                                                                                                                                                        |                                                                                                                                                                                                                                                                                                                                                                                                                                                                                                                                                                                                                                                                                                                                                                                                                                                                                                                                                                                                                                                                                                                                                                                                               |
|------------------------------------------------------------------------------------------------------------------------------------------------------------------------------------------------------------------------------------------------------------------------------------------------------------------------------------------------------------------------------------------------------------------------------------------------------------------------------------------------------------------------------------------------------------------------------------------------------------------------------------------------------------------------------------------------------------------------------------------------------------------------------------------------------------------------------------------------------------------------------------------------------------------------------------------------------------------------------------------------------------------------------------------------------------------------------------------------------------------------------------------------------------------------------------------------------------------------|------------------------------------------------------------------------------------------------------------------------------------------------------------------------------------------------------------------------------------------------------|--------------------------------------------------------------------------------------------------------------------------------------------------------------------------------------------------------------------------------------------------------------------------------------------------------|---------------------------------------------------------------------------------------------------------------------------------------------------------------------------------------------------------------------------------------------------------------------------------------------------------------------------------------------------------------------------------------------------------------------------------------------------------------------------------------------------------------------------------------------------------------------------------------------------------------------------------------------------------------------------------------------------------------------------------------------------------------------------------------------------------------------------------------------------------------------------------------------------------------------------------------------------------------------------------------------------------------------------------------------------------------------------------------------------------------------------------------------------------------------------------------------------------------|
| <p>"labourer*".ti,ab. OR<br/> "occupation*".ti,ab. OR<br/> "personnel*".ti,ab. OR<br/> "professional".ti,ab. OR<br/> "professionals".ti,ab. OR<br/> "staff".ti,ab. OR<br/> "staffing*".ti,ab. OR<br/> "vocation".ti,ab. OR<br/> "vocations".ti,ab. OR<br/> "worker*".ti,ab. OR<br/> "workforce".ti,ab. OR<br/> "workplace*".ti,ab. OR<br/> "work place*".ti,ab. OR<br/> "worksite*".ti,ab.</p> <p>OR</p> <p>"ambulance*".ti,ab. OR<br/> "paramedic*".ti,ab. OR<br/> "disaster responder*".ti,ab. OR<br/> "doctor*".ti,ab. OR<br/> "emergency service*".ti,ab. OR<br/> "emergency responder*".ti,ab.</p> <p>OR</p> <p>"emergency medical".ti,ab. OR<br/> "firefighter*".ti,ab. OR<br/> "fire fighter*".ti,ab. OR<br/> "first responder*".ti,ab. OR<br/> "general practitioner*".ti,ab. OR<br/> "health care provider*".ti,ab. OR<br/> "healthcare provider*".ti,ab. OR<br/> "humanitarian aid*".ti,ab. OR<br/> "humanitarian relie*".ti,ab. OR<br/> "humanitarian service*".ti,ab. OR<br/> "humanitarian worker*".ti,ab. OR<br/> "medical resident*".ti,ab. OR<br/> "medic".ti,ab. OR<br/> "medics".ti,ab. OR<br/> "nurse*".ti,ab. OR<br/> "nursing".ti,ab. OR<br/> "paramedic*".ti,ab. OR<br/> "police*".ti,ab. OR</p> | <p>"labourer*".ti,ab. OR<br/> "personnel*".ti,ab. OR<br/> "professionals".ti,ab.<br/> OR "staff".ti,ab. OR<br/> "worker*".ti,ab. OR<br/> "workforce".ti,ab. OR<br/> "workplace*".ti,ab. OR<br/> "work place*".ti,ab. OR<br/> "worksite*".ti,ab.)</p> | <p>"randomized".ti,ab. OR<br/> "randomised".ti,ab. OR<br/> "quasi-experiment*".ti,ab. OR<br/> "quasi experiment*".ti,ab. OR<br/> "control group".ti,ab. OR<br/> "comparison group".ti,ab. OR<br/> "wait-list control".ti,ab. OR<br/> "wait list control".ti,ab. OR<br/> "control condition".ti,ab.</p> | <p>"eating disorder*".ti,ab. OR<br/> "mental disorder*".ti,ab. OR<br/> "mental health*".ti,ab. OR<br/> "mental illness*".ti,ab. OR<br/> "mood disorder*".ti,ab. OR<br/> "obsessive compulsive disorder*".ti,ab. OR<br/> "ocd".ti,ab. OR<br/> "panic disorder*".ti,ab. OR<br/> "phobi*".ti,ab. OR<br/> "post traumatic*".ti,ab. OR<br/> "psychiatric diagnos*".ti,ab. OR<br/> "psychiatric disease*".ti,ab. OR<br/> "psychiatric disorder*".ti,ab. OR<br/> "psychiatric illness*".ti,ab. OR<br/> "psychological disorder*".ti,ab. OR<br/> "psychos*".ti,ab. OR<br/> "psychotic*".ti,ab. OR<br/> "psychological distress*".ti,ab. OR<br/> "ptsd".ti,ab. OR<br/> "ptss".ti,ab. OR<br/> "somatiform disorder*".ti,ab. OR<br/> "schizophren*".ti,ab. OR<br/> "stress*".ti,ab.</p> <p>OR</p> <p>"User satisfaction".ti,ab. OR<br/> "acceptability".ti,ab. OR<br/> "feasibility".ti,ab.</p> <p>OR</p> <p>"Employment".sh. OR<br/> "Employee Efficiency".sh. OR<br/> "Employee Absenteeism".sh. OR<br/> "Work Satisfaction".sh. OR<br/> "Retirement".sh. OR<br/> "absenteeism*".ti,ab. OR<br/> "back to work".ti,ab. OR<br/> "early retir*".ti,ab. OR<br/> "effectiveness".ti,ab. OR<br/> "employabil*".ti,ab. OR</p> |
|------------------------------------------------------------------------------------------------------------------------------------------------------------------------------------------------------------------------------------------------------------------------------------------------------------------------------------------------------------------------------------------------------------------------------------------------------------------------------------------------------------------------------------------------------------------------------------------------------------------------------------------------------------------------------------------------------------------------------------------------------------------------------------------------------------------------------------------------------------------------------------------------------------------------------------------------------------------------------------------------------------------------------------------------------------------------------------------------------------------------------------------------------------------------------------------------------------------------|------------------------------------------------------------------------------------------------------------------------------------------------------------------------------------------------------------------------------------------------------|--------------------------------------------------------------------------------------------------------------------------------------------------------------------------------------------------------------------------------------------------------------------------------------------------------|---------------------------------------------------------------------------------------------------------------------------------------------------------------------------------------------------------------------------------------------------------------------------------------------------------------------------------------------------------------------------------------------------------------------------------------------------------------------------------------------------------------------------------------------------------------------------------------------------------------------------------------------------------------------------------------------------------------------------------------------------------------------------------------------------------------------------------------------------------------------------------------------------------------------------------------------------------------------------------------------------------------------------------------------------------------------------------------------------------------------------------------------------------------------------------------------------------------|

|  |                                                                                                                                                                                                                                                                                       |  |  |                                                                                                                                                                                                                                                                                                                                                                                                                                                                                                                                                                                                                                                                                                                                                                                                                                                                                                                                                                                                                                                                                                                                                                                     |
|--|---------------------------------------------------------------------------------------------------------------------------------------------------------------------------------------------------------------------------------------------------------------------------------------|--|--|-------------------------------------------------------------------------------------------------------------------------------------------------------------------------------------------------------------------------------------------------------------------------------------------------------------------------------------------------------------------------------------------------------------------------------------------------------------------------------------------------------------------------------------------------------------------------------------------------------------------------------------------------------------------------------------------------------------------------------------------------------------------------------------------------------------------------------------------------------------------------------------------------------------------------------------------------------------------------------------------------------------------------------------------------------------------------------------------------------------------------------------------------------------------------------------|
|  | <p>"police m*".ti,ab. OR<br/> "police wom*".ti,ab. OR<br/> "police officer*".ti,ab. OR<br/> "firem*".ti,ab. OR<br/> "fire m*".ti,ab. OR<br/> "fire wom*".ti,ab. OR<br/> "physician*".ti,ab. OR<br/> "relief work*".ti,ab. OR<br/> "rescuer*".ti,ab. OR<br/> "rescue work*".ti,ab.</p> |  |  | <p>"employment status*".ti,ab. OR<br/> "job length*".ti,ab. OR<br/> "job retenti*".ti,ab. OR<br/> "job satisf*".ti,ab. OR<br/> "work satisf*".ti,ab. OR<br/> "medical certificate*".ti,ab. OR<br/> "presenteeism*".ti,ab. OR<br/> "productivit*".ti,ab. OR<br/> "prolonged work*".ti,ab. OR<br/> "prolonging work*".ti,ab. OR<br/> "resignati*".ti,ab. OR<br/> "return to work".ti,ab. OR<br/> "sick leav*".ti,ab. OR<br/> "sickness absen*".ti,ab. OR<br/> "sickness presen*".ti,ab. OR<br/> "sick listing*".ti,ab. OR<br/> "sustainable work*".ti,ab. OR<br/> "sustained work*".ti,ab. OR<br/> "unemploy*".ti,ab. OR<br/> "work absence*".ti,ab. OR<br/> "work abilit*".ti,ab. OR<br/> "work capacit*".ti,ab. OR<br/> "work disabilit*".ti,ab. OR<br/> "work engag*".ti,ab. OR<br/> "work function*".ti,ab. OR<br/> "work participati*".ti,ab. OR<br/> "work performan*".ti,ab. OR<br/> "work retention".ti,ab. OR<br/> "turnover*".ti,ab. OR<br/> "turn over*".ti,ab.</p> <p>OR</p> <p>"drop out*".ti,ab. OR<br/> "dropout*".ti,ab.</p> <p>OR</p> <p>"life engag*".ti,ab. OR<br/> "life satisf*".ti,ab. OR<br/> "meaning of life".ti,ab. OR<br/> "purpose in life".ti,ab. OR</p> |
|--|---------------------------------------------------------------------------------------------------------------------------------------------------------------------------------------------------------------------------------------------------------------------------------------|--|--|-------------------------------------------------------------------------------------------------------------------------------------------------------------------------------------------------------------------------------------------------------------------------------------------------------------------------------------------------------------------------------------------------------------------------------------------------------------------------------------------------------------------------------------------------------------------------------------------------------------------------------------------------------------------------------------------------------------------------------------------------------------------------------------------------------------------------------------------------------------------------------------------------------------------------------------------------------------------------------------------------------------------------------------------------------------------------------------------------------------------------------------------------------------------------------------|

|  |  |  |  |                                                                                                                                                                                                                                                                                                                                                                                                                                                                                                                                                                                                                                                                                                                                                                                                                                                                                                                                                                                                                                                                                                                              |
|--|--|--|--|------------------------------------------------------------------------------------------------------------------------------------------------------------------------------------------------------------------------------------------------------------------------------------------------------------------------------------------------------------------------------------------------------------------------------------------------------------------------------------------------------------------------------------------------------------------------------------------------------------------------------------------------------------------------------------------------------------------------------------------------------------------------------------------------------------------------------------------------------------------------------------------------------------------------------------------------------------------------------------------------------------------------------------------------------------------------------------------------------------------------------|
|  |  |  |  | <p>"positive affect*".ti,ab. OR<br/> "positive emotion*".ti,ab. OR<br/> "resilien*".ti,ab. OR<br/> "self concept*".ti,ab. OR<br/> "self control*".ti,ab. OR<br/> "self efficac*".ti,ab. OR<br/> "self esteem*".ti,ab. OR<br/> "swb".ti,ab. OR<br/> "well being*".ti,ab. OR<br/> "wellbeing*".ti,ab.</p> <p>OR</p> <p>"Quality of Life".sh. OR<br/> "disability adjusted life".ti,ab. OR<br/> "qaly".ti,ab. OR<br/> "daly".ti,ab. OR<br/> "functioning".ti,ab. OR<br/> "functional abilit*" OR<br/> "functionalit*" OR<br/> "hrqol*".ti,ab. OR<br/> "life activit*".ti,ab. OR<br/> "life participati*".ti,ab. OR<br/> "life stress*".ti,ab. OR<br/> "qol".ti,ab. OR<br/> "qoli".ti,ab. OR<br/> "quality of life*".ti,ab. OR<br/> "self car*".ti,ab. OR<br/> "selfcar*".ti,ab. OR<br/> "sickness impact profile*".ti,ab. OR<br/> "social function*".ti,ab. OR<br/> "social participati*".ti,ab.</p> <p>OR</p> <p>"helpseek*".ti,ab. OR<br/> "help seek*".ti,ab. OR<br/> "help-seek*".ti,ab. OR<br/> "seek help".ti,ab. OR<br/> "seeking help".ti,ab. OR<br/> "seek treatment".ti,ab. OR<br/> "seeking treatment".ti,ab. OR</p> |
|--|--|--|--|------------------------------------------------------------------------------------------------------------------------------------------------------------------------------------------------------------------------------------------------------------------------------------------------------------------------------------------------------------------------------------------------------------------------------------------------------------------------------------------------------------------------------------------------------------------------------------------------------------------------------------------------------------------------------------------------------------------------------------------------------------------------------------------------------------------------------------------------------------------------------------------------------------------------------------------------------------------------------------------------------------------------------------------------------------------------------------------------------------------------------|

|               |                                                                                                                                                                                                                                                                                                                                                                                                                                                                                                                                                                                                                                                                                                                                                                                                                                                                                                                                                                                                                                               |                                                                           |                                                                                                                                                                                                                                                                                                                                                                                                                                                                        |                                                                                                                                                                                                                                                                                                                                                                                                                                                                                                                                                                                                                                                                                                                                                                                                                                                                                                                                                                                                                                                                                                                                                                                                                                                                                                                                                                                                                                                                                                                                                                                                                                                                                                                                                                                                                                                                                                                                                                                           |
|---------------|-----------------------------------------------------------------------------------------------------------------------------------------------------------------------------------------------------------------------------------------------------------------------------------------------------------------------------------------------------------------------------------------------------------------------------------------------------------------------------------------------------------------------------------------------------------------------------------------------------------------------------------------------------------------------------------------------------------------------------------------------------------------------------------------------------------------------------------------------------------------------------------------------------------------------------------------------------------------------------------------------------------------------------------------------|---------------------------------------------------------------------------|------------------------------------------------------------------------------------------------------------------------------------------------------------------------------------------------------------------------------------------------------------------------------------------------------------------------------------------------------------------------------------------------------------------------------------------------------------------------|-------------------------------------------------------------------------------------------------------------------------------------------------------------------------------------------------------------------------------------------------------------------------------------------------------------------------------------------------------------------------------------------------------------------------------------------------------------------------------------------------------------------------------------------------------------------------------------------------------------------------------------------------------------------------------------------------------------------------------------------------------------------------------------------------------------------------------------------------------------------------------------------------------------------------------------------------------------------------------------------------------------------------------------------------------------------------------------------------------------------------------------------------------------------------------------------------------------------------------------------------------------------------------------------------------------------------------------------------------------------------------------------------------------------------------------------------------------------------------------------------------------------------------------------------------------------------------------------------------------------------------------------------------------------------------------------------------------------------------------------------------------------------------------------------------------------------------------------------------------------------------------------------------------------------------------------------------------------------------------------|
|               |                                                                                                                                                                                                                                                                                                                                                                                                                                                                                                                                                                                                                                                                                                                                                                                                                                                                                                                                                                                                                                               |                                                                           |                                                                                                                                                                                                                                                                                                                                                                                                                                                                        | "treatment seeking".ti,ab. OR<br>"help seeking behav*".ti,ab.                                                                                                                                                                                                                                                                                                                                                                                                                                                                                                                                                                                                                                                                                                                                                                                                                                                                                                                                                                                                                                                                                                                                                                                                                                                                                                                                                                                                                                                                                                                                                                                                                                                                                                                                                                                                                                                                                                                             |
| <b>SciELO</b> | ("enterprise*" OR "business*" OR "employed" OR "employee*" OR "employer*" OR "employment*" OR "informal sector*" OR "informal work*" OR "laborer*" OR "labourer*" OR "occupation*" OR "personnel*" OR "professional" OR "professionals" OR "staff" OR "staffing*" OR "vocation" OR "vocations" OR "worker*" OR "workforce" OR "workplace*" OR "work place*" OR "worksite*" OR "ambulance*" OR "paramedic*" OR "disaster responder*" OR "doctor*" OR "emergency service*" OR "emergency responder*" OR "emergency medical" OR "firefighter*" OR "fire fighter*" OR "first responder*" OR "general practitioner*" OR "health care provider*" OR "healthcare provider*" OR "humanitarian aid*" OR "humanitarian relie*" OR "humanitarian service*" OR "humanitarian worker*" OR "medical resident*" OR "medic" OR "medics" OR "nurse*" OR "nursing" OR "paramedic*" OR "police*" OR "police m*" OR "police wom*" OR "police officer*" OR "firem*" OR "fire m*" OR "fire wom*" OR "physician*" OR "relief work*" OR "rescuer*" OR "rescue work*") | (screen* OR monitoring OR check OR check-up OR surveillance OR detection) | ("RCT" OR "randomized controlled trial" OR "randomised controlled trial" OR "non-randomized controlled trial" OR "non-randomised controlled trial" OR "non randomized controlled trial" OR "non randomised controlled trial" OR "random allocation" OR "random assignment" OR "randomized" OR "randomised" OR "quasi-experiment*" OR "quasi experiment*" OR "control group" OR "comparison group" OR "wait-list control" OR "waitlist control" OR "control condition") | ("adjustment" OR "affective disorder*" OR "anxiet*" OR "bipolar*" OR "burn out*" OR "burnout*" OR "CMD" OR "depressi*" OR "eating disorder*" OR "mental disorder*" OR "mental health*" OR "mental illness*" OR "mood disorder*" OR "obsessive compulsive disorder*" OR "ocd" OR "panic disorder*" OR "phobi*" OR "post traumatic*" OR "psychiatric diagnos*" OR "psychiatric disease*" OR "psychiatric disorder*" OR "psychiatric illness*" OR "psychological disorder*" OR "psychos*" OR "psychotic*" OR "psychological distress*" OR "ptsd" OR "ptss" OR "somatoform disorder*" OR "schizophren*" OR "stress*" OR "User satisfaction" OR "acceptability" OR "feasibility" OR "absenteeism*" OR "back to work" OR "early retir*" OR "effectiveness" OR "employabil*" OR "employment status*" OR "job length*" OR "job retenti*" OR "job satisf*" OR "work satisf*" OR "medical certificate*" OR "presenteeism*" OR "productivit*" OR "prolonged work*" OR "prolonging work*" OR "resignati*" OR "return to work" OR "sick leav*" OR "sickness absen*" OR "sickness presen*" OR "sick listing*" OR "sustainable work*" OR "sustained work*" OR "unemploy*" OR "work absence*" OR "work abilit*" OR "work capacit*" OR "work disabilit*" OR "work engag*" OR "work function*" OR "work participati*" OR "work performan*" OR "work retention" OR "turnover*" OR "turn over*" OR "drop out*" OR "dropout*" OR "life engag*" OR "life satisf*" OR "meaning of life" OR "purpose in life" OR "positive affect*" OR "positive emotion*" OR "resilien*" OR "self concept*" OR "self control*" OR "self efficac*" OR "self esteem*" OR "swb" OR "well being*" OR "wellbeing*" OR "disability adjusted life" OR "qaly" OR "daly" OR "functioning" OR "functional abilit*" OR "functionalit*" OR "hrqol*" OR "life activit*" OR "life participati*" OR "life stress*" OR "qol" OR "qoli" OR "quality of life*" OR "self car*" OR "selfcar*" OR "sickness impact profile*" OR "social function*" OR |

|  |  |  |  |                                                                                                                                                                                                   |
|--|--|--|--|---------------------------------------------------------------------------------------------------------------------------------------------------------------------------------------------------|
|  |  |  |  | "social participati*" OR "helpseek*" OR "help seek*" OR "help-seek*" OR "seek help" OR "seeking help" OR "seek treatment" OR "seeking treatment" OR "treatment seeking" OR "help seeking behav*") |
|--|--|--|--|---------------------------------------------------------------------------------------------------------------------------------------------------------------------------------------------------|
