# Supplementary material
Source: HighWire-hosted journal article supplement (https://oem.bmj.com/content/80/8/469)
Supplement: inline-supplementary-material-2 [file inline-supplementary-material-2.pdf]

| Study                   | Randomisation process | Deviations from the intended interventions | Missing outcome data | Measurement of the outcome | Selection of the reported result | Overall |
|-------------------------|-----------------------|--------------------------------------------|----------------------|----------------------------|----------------------------------|---------|
| Kant et al. 2008        | +                     | !                                          | -                    | +                          | -                                | -       |
| Lexis et al. 2011       | !                     | +                                          | +                    | -                          | +                                | -       |
| Garnter et al. 2013     | +                     | !                                          | !                    | +                          | +                                | !       |
| Boiler et al. 2014      | +                     | +                                          | +                    | +                          | +                                | +       |
| Wang et al. 2007        | +                     | +                                          | +                    | +                          | +                                | +       |
| Farzanfar et al. 2011   | +                     | !                                          | -                    | +                          | -                                | -       |
| Addley et al. 2014      | !                     | +                                          | -                    | !                          | +                                | -       |
| van Holland et al. 2017 | -                     | -                                          | -                    | !                          | +                                | -       |
| Steel et al. 2022       | !                     | -                                          | !                    | +                          | !                                | -       |

+ Low risk  
! Some concerns  
- High risk

**Figure 1.** Summary risk of bias judgements in each domain, and overall, for each study. Note. Farzanfar et al. (2012) and Addley et al. (2014) assess risk of bias pertaining to per-protocol effect. All other studies focus on intention to treat data.
